# Supplementary material for: A sorghum (Sorghum bicolor) mutant with altered carbon isotope ratio
Source: PLoS One. 2017 Jun 22;12(6):e0179567. doi: 10.1371/journal.pone.0179567 (PMC5480886; doi:10.1371/journal.pone.0179567)
Supplement: S1 Table — The annotations of the genes are according to phytozome v.02. (XLSX) [file pone.0179567.s007.xlsx]

## Sheet: Supple 1
Table S1: List of SNPs from a region of Chromosome 10 with AF=1 in Mutat pool (pool 1) where as AF < = 0.6 in WT pool (pool 4).
Chromosome	Position	Ref_allele	Alt_allele	AF_pool1	AF_pool2	AF_pool4
Chr10_pilonV9	57505824	C	T	1	1	0.4
Chr10_pilonV9	57513792	C	T	1	1	0.26
Chr10_pilonV9	57514338	G	A	1	1	0.23
Chr10_pilonV9	57517260	C	T	1	0.97	0.3
Chr10_pilonV9	57517477	C	T	1	1	0.16
Chr10_pilonV9	57517644	G	A	1		0.42
Chr10_pilonV9	57517808	G	A	1	1	0.24
Chr10_pilonV9	57520367	C	T		1	0.27
Chr10_pilonV9	57524966	C	T	1		0.21
Chr10_pilonV9	57526020	G	A	1	0.97	0.45
Chr10_pilonV9	57526405	C	T	1	1	0.61
Chr10_pilonV9	57526441	G	A	1	1	0.48
Chr10_pilonV9	57526557	G	A	1	1	0.24
Chr10_pilonV9	57526923	G	A	1		0.41
Chr10_pilonV9	57527542	G	A	1	0.96	0.2
Chr10_pilonV9	57527776	C	T	1		0.47
Chr10_pilonV9	57527854	G	A	1		0.34
Chr10_pilonV9	57527886	C	T	1	0.89	0.35
Chr10_pilonV9	57529397	C	T	1	1	0.23
Chr10_pilonV9	57531027	G	A	1		0.14
Chr10_pilonV9	57532238	C	T	1	0.96	0.33
Chr10_pilonV9	57534261	C	T	1	0.98	0.29
Chr10_pilonV9	57535062	c	T	1		0.28
Chr10_pilonV9	57535247	C	T	1	0.96	0.34
Chr10_pilonV9	57535579	C	T	1	1	0.32
Chr10_pilonV9	57535709	c	T	1	0.92	0.21
Chr10_pilonV9	57536087	G	A	1	0.96	0.25
Chr10_pilonV9	57536247	G	A	1		0.26
Chr10_pilonV9	57536557	G	A	1		0.56
Chr10_pilonV9	57536663	G	A	1		0.33
Chr10_pilonV9	57538181	G	A	1		0
Chr10_pilonV9	57538552	C	T		1	0.14
Chr10_pilonV9	57539109	G	A	1		0.4
Chr10_pilonV9	57540093	G	A	1	0.97	0.29
Chr10_pilonV9	57540127	G	A	1		0.32
Chr10_pilonV9	57542362	C	T	1		0.5
Chr10_pilonV9	57542431	G	A	1		0.47
Chr10_pilonV9	57544578	C	T	1	1	0.28
Chr10_pilonV9	57551674	C	T	1	0.97	0.26
Chr10_pilonV9	57555299	G	A	1	0.98	0.24
Chr10_pilonV9	57556022	C	T	1		0.32
Chr10_pilonV9	57556534	C	T	1	0.96	0.24
Chr10_pilonV9	57557048	G	A	1		0.43
Chr10_pilonV9	57557391	C	T	1	0.96	0.33
Chr10_pilonV9	57557983	G	A	1	0.97	0.39
Chr10_pilonV9	57558485	G	A	1	1	0.24
Chr10_pilonV9	57560567	G	A	1	1	0.36
Chr10_pilonV9	57560993	G	A	1		0.47
Chr10_pilonV9	57561145	G	A	1	0.97	0.38
Chr10_pilonV9	57562214	C	T	1	1	0.18
Chr10_pilonV9	57563145	G	A	1	0.97	0.31
Chr10_pilonV9	57619873	G	A	1	1	0.15
Chr10_pilonV9	57634354	G	A	1	1	0
Chr10_pilonV9	57634431	C	T	1	1	0.24
Chr10_pilonV9	57635581	G	A	1	0.94	0.31
Chr10_pilonV9	57635707	C	T	1		0.23
Chr10_pilonV9	57635895	G	A	1	0.97	0.24
Chr10_pilonV9	57636334	G	A	1	1	0.29
Chr10_pilonV9	57636756	C	T	1	1	0.29
Chr10_pilonV9	57637754	G	A	1	1	0.31
Chr10_pilonV9	57640623	G	A	1		0.4
Chr10_pilonV9	57640775	C	T	1		0.4
Chr10_pilonV9	57640778	G	A	1		0.4
Chr10_pilonV9	57641351	C	T		1	0.4
Chr10_pilonV9	57642064	C	T		1	0.16
Chr10_pilonV9	57643878	G	A		0.83	0.16
Chr10_pilonV9	57643894	C	T	1		0.12
Chr10_pilonV9	57678758	G	A	1	0.97	0.32
Chr10_pilonV9	57751454	C	T	1		0.32
Chr10_pilonV9	57754453	C	T	1		0.14
Chr10_pilonV9	57758452	G	A	1		0.31
Chr10_pilonV9	57758468	C	T	1		0.31
Chr10_pilonV9	57764819	C	T	1	1	0.23
Chr10_pilonV9	57764981	G	A	1	0.98	0.33
Chr10_pilonV9	57766214	C	T	1	1	0.33
Chr10_pilonV9	57766229	C	T	1	1	0.33
Chr10_pilonV9	57766232	C	T	1	1	0.31
Chr10_pilonV9	57766236	C	T	1	1	0.31
Chr10_pilonV9	57766258	G	A	1	0.96	0.33
Chr10_pilonV9	57766467	C	T	1	0.96	0.32
Chr10_pilonV9	57767262	G	A	1	1	0.36
Chr10_pilonV9	57767316	C	T	1	1	0.28
Chr10_pilonV9	57767500	C	T	1	0.96	0.35
Chr10_pilonV9	57767603	C	T	1	1	0.36
Chr10_pilonV9	57768125	G	A	1		0.2
Chr10_pilonV9	57769106	G	A	1	1	0.36
Chr10_pilonV9	57769429	C	T	1		0.18
Chr10_pilonV9	57772175	C	T	1	0.96	0.27
Chr10_pilonV9	57772218	C	T	1	0.96	0.24
Chr10_pilonV9	57773622	G	A	1		0.32
Chr10_pilonV9	57777091	G	A	1	0.93	0
Chr10_pilonV9	57777098	G	A	1		0
Chr10_pilonV9	57777102	C	T	1		0
Chr10_pilonV9	57777121	G	A	1	1	0
Chr10_pilonV9	57777148	C	T	1	1	0.34
Chr10_pilonV9	57777206	G	A	1	1	0.31
Chr10_pilonV9	57777210	G	A	1	1	0.33
Chr10_pilonV9	57777242	C	T	1	1	0.32
Chr10_pilonV9	57777258	C	T	1	1	0.29
Chr10_pilonV9	57777260	G	A	1	1	0.29
Chr10_pilonV9	57777271	G	A	1	0.97	0.29
Chr10_pilonV9	57779013	C	T	1	0.97	0.31
Chr10_pilonV9	57780001	C	T	1	1	0.4
Chr10_pilonV9	57782313	G	A	1	0.96	0.28
Chr10_pilonV9	57783968	C	T	1	1	0.31
Chr10_pilonV9	57791809	C	T	1		0.12
Chr10_pilonV9	57818626	G	A	1		0.46
Chr10_pilonV9	57823312	G	A	1	0.94	0.41
Chr10_pilonV9	57836440	C	T	1	1	0.47
Chr10_pilonV9	57892835	G	A	1	0.95	0.33
Chr10_pilonV9	58096676	C	T	1		0.38
Chr10_pilonV9	58100844	C	T	1	0.97	0.39
Chr10_pilonV9	58210030	C	T	1	1	0.28
Chr10_pilonV9	58240880	C	T	1	1	0.34
Chr10_pilonV9	58256467	C	T	1	0.97	0.35
Chr10_pilonV9	58273528	C	T	1	1	0.24
Chr10_pilonV9	58276195	G	A	1		0.27
Chr10_pilonV9	58278030	G	A	1	0.98	0.29
Chr10_pilonV9	58279277	G	A	1	1	0.42
Chr10_pilonV9	58279905	G	A	1	0.97	0.26
Chr10_pilonV9	58280376	G	A	1	0.97	0.33
Chr10_pilonV9	58286361	C	T	1	0.98	0.24
Chr10_pilonV9	58287221	G	A	1	0.95	0.03
Chr10_pilonV9	58295732	G	A	1	1	0.14
Chr10_pilonV9	58460935	G	A	1	1	0.23
Chr10_pilonV9	58602842	C	T	1	0.93	0.33
Chr10_pilonV9	58670095	C	T	1	0.97	0.43
Chr10_pilonV9	58709930	C	T	1		0.28
Chr10_pilonV9	58711161	C	T	1		0.18
Chr10_pilonV9	58735650	G	A	1		0.26
Chr10_pilonV9	58761314	C	T	1	1	0.23
Chr10_pilonV9	58763452	C	T	1	1	0.28
Chr10_pilonV9	58875407	C	T	1		0.36
Chr10_pilonV9	58998701	C	T	1		0.27
Chr10_pilonV9	59036532	G	A	1		0.52
Chr10_pilonV9	59134798	G	A	1	1	0.57
Chr10_pilonV9	59142571	C	T	1	1	0.32
Chr10_pilonV9	59149118	C	T	1	0.97	0.2
Chr10_pilonV9	59162695	G	A	1	1	0.31
Chr10_pilonV9	59162801	G	A	1		0.5
Chr10_pilonV9	59162802	C	T	1		0.5
Chr10_pilonV9	59162963	C	T	1	1	0.37
Chr10_pilonV9	59162997	C	T	1	1	0.37
Chr10_pilonV9	59163017	C	T	1	1	0.24
Chr10_pilonV9	59163019	C	T	1	1	0.24
Chr10_pilonV9	59163111	C	T	1	1	0.38
Chr10_pilonV9	59163179	C	T	1	1	0.56
Chr10_pilonV9	59163196	G	A	1		0.6
Chr10_pilonV9	59163219	G	A	1		0.5
Chr10_pilonV9	59163340	C	T	1		0.53
Chr10_pilonV9	59163472	G	A	1		0.28
Chr10_pilonV9	59163828	C	T	1	0.88	0.33
Chr10_pilonV9	59163892	G	A	1		0.32
Chr10_pilonV9	59164385	C	T	1	0.95	0.23
Chr10_pilonV9	59164868	C	T	1		0.35
Chr10_pilonV9	59164899	G	A	1	0.96	0.33
Chr10_pilonV9	59164902	C	T	1	0.96	0.33
Chr10_pilonV9	59164914	C	T	1	0.97	0.29
Chr10_pilonV9	59164915	C	T	1	0.97	0.29
Chr10_pilonV9	59164919	G	A	1	0.97	0.29
Chr10_pilonV9	59164924	G	A	1	0.97	0.27
Chr10_pilonV9	59164931	C	T	1	0.97	0.25
Chr10_pilonV9	59169318	C	T	1		0.34
Chr10_pilonV9	59170214	G	A	1	0.97	0.26
Chr10_pilonV9	59170407	C	T	1	0.97	0.22
Chr10_pilonV9	59170485	G	A	1	0.97	0.26
Chr10_pilonV9	59170586	G	A	1	1	0.12
Chr10_pilonV9	59170591	C	T	1	1	0.12
Chr10_pilonV9	59170613	C	T	1	1	0.16
Chr10_pilonV9	59170692	C	T	1	0.97	0.22
Chr10_pilonV9	59174423	G	A	1	0.95	0.29
Chr10_pilonV9	59174746	G	A	1	0.97	0.4
Chr10_pilonV9	59174834	C	T	1	0.97	0.29
Chr10_pilonV9	59178815	C	T	1	1	0.27
Chr10_pilonV9	59192813	G	A	1	1	0
Chr10_pilonV9	59262746	G	A	1	1	0.36
Chr10_pilonV9	59292188	G	A	1	1	0.4
Chr10_pilonV9	59322235	C	T	1	0.96	0.2
Chr10_pilonV9	59348797	C	T	1		0.3
Chr10_pilonV9	59408202	G	A	1	0.85	0.34
Chr10_pilonV9	59481340	G	A	1	1	0.11
Chr10_pilonV9	59483095	G	A	1	0.94	0.39
Chr10_pilonV9	59484077	C	T	1	1	0.34
Chr10_pilonV9	59484357	C	T	1	0.95	0.29
Chr10_pilonV9	59485771	C	T	1		0.3
Chr10_pilonV9	59485785	C	T	1		0.28
Chr10_pilonV9	59486002	G	A	1	1	0.32
Chr10_pilonV9	59486670	C	T	1	0.96	0.26
Chr10_pilonV9	59488162	C	T	1	1	0.34
Chr10_pilonV9	59491974	G	A	1	1	0.4
Chr10_pilonV9	59492164	G	A	1	0.97	0.22
Chr10_pilonV9	59495619	C	T	1	1	0.27
Chr10_pilonV9	59495638	G	A	1	1	0.31
Chr10_pilonV9	59496351	G	A	1		0.24
Chr10_pilonV9	59496400	G	A	1		0.27
Chr10_pilonV9	59496444	G	A	1		0.23
Chr10_pilonV9	59496769	G	A	1	1	0.28
Chr10_pilonV9	59497389	G	A		1	0.44
Chr10_pilonV9	59497760	C	T	1	1	0.29
Chr10_pilonV9	59497806	G	A	1	1	0.36
Chr10_pilonV9	59504206	C	T	1	1	0.17
Chr10_pilonV9	59506148	G	A	1	0.95	0.54
Chr10_pilonV9	59506255	C	T	1	1	0.39
Chr10_pilonV9	59506338	C	T	1	0.96	0.4
Chr10_pilonV9	59506557	C	T	1	1	0.67
Chr10_pilonV9	59507904	C	T	1	0.97	0.26
Chr10_pilonV9	59508001	G	A	1	0.97	0.24
Chr10_pilonV9	59509358	G	A	1	0.97	0.32
Chr10_pilonV9	59510646	C	T	1		0.28
Chr10_pilonV9	59513092	G	A	1	0.93	0.34
Chr10_pilonV9	59513116	C	T	1	0.92	0.34
