# Supplementary material for: A sorghum (Sorghum bicolor) mutant with altered carbon isotope ratio
Source: PLoS One. 2017 Jun 22;12(6):e0179567. doi: 10.1371/journal.pone.0179567 (PMC5480886; doi:10.1371/journal.pone.0179567)
Supplement: S2 Table — (XLSX) [file pone.0179567.s008.xlsx]

## Sheet: List of mutations
Table S2. The detail of 37 SNPs in the genomic region.
SN	Chr	Position (BTx623)	Ref	Alt	Affected gene	Gene region mutated (Amino acid changes)	Annotation	Gene name	Annotation	Rice ortholog	Arabidopsis ortholog	Gene Ontology term	Expression data	Functional information
1	Chr10	58127862	G	A	Sobic.010G241900	(Leu->Phe)	Leucine-rich receptor-like protein kinase family protein		Leucine-rich receptor-like protein kinase family protein	LOC_Os06g47700.1	AT1G72300.1	GO:0004672,GO:0005524,GO:0006468,GO:0005515	Sekhon et al.: Expressed in primary root tissue	SNP located in LRR region
2	Chr10	59789763	C	T	Sobic.010G263800	(Gly->Asp)	uncharacterized protein		uncharacterized protein	LOC_Os06g49990.1	AT3G51130.1		Sekhon et al. : Expressed in almost all tissues. Li et al.: Upregulated in M cells
3	Chr10	59985708	C	T	Sobic.010G266000	(Pro->Ser)				LOC_Os06g50130.1	AT2G17972.1
4	Chr10	57941104	G	A	Sobic.010G239500	Core promoter	polyubiquitin 10	UBQ10	polyubiquitin 10	LOC_Os06g46770.1	AT4G05320.2	GO:0005515
5	Chr10	57952919	C	T	Sobic.010G239600	Core promoter	RNA polymerase I specific transcription initiation factor RRN3 protein		RNA polymerase I specific transcription initiation factor RRN3 protein	LOC_Os06g47350.1	AT2G34750.1
6	Chr10	57953107	C	T	Sobic.010G239600	Core promoter	RNA polymerase I specific transcription initiation factor RRN3 protein		RNA polymerase I specific transcription initiation factor RRN3 protein	LOC_Os06g47350.1	AT2G34750.1
7	Chr10	57953214	G	A	Sobic.010G239600	Core promoter	RNA polymerase I specific transcription initiation factor RRN3 protein		RNA polymerase I specific transcription initiation factor RRN3 protein	LOC_Os06g47350.1	AT2G34750.1
8	Chr10	57953408	G	A	Sobic.010G239600	Core promoter	RNA polymerase I specific transcription initiation factor RRN3 protein		RNA polymerase I specific transcription initiation factor RRN3 protein	LOC_Os06g47350.1	AT2G34750.1
9	Chr10	57953787	C	T	Sobic.010G239600	five_prime_UTR.2	RNA polymerase I specific transcription initiation factor RRN3 protein		RNA polymerase I specific transcription initiation factor RRN3 protein	LOC_Os06g47350.1	AT2G34750.1
10	Chr10	57973983	G	A	Sobic.010G239800	Core promoter	decapping 2	ATDCP2,DCP2,TDT	decapping 2	LOC_Os02g56210.1	AT5G13570.1	GO:0016787,GO:0003723,GO:0030145
11	Chr10	57990325	C	T	Sobic.010G240000	Core promoter
12	Chr10	57990394	G	A	Sobic.010G240000	Core promoter
13	Chr10	58012250	G	A	Sobic.010G240200	Core promoter
14	Chr10	58084683	G	A	Sobic.010G241200	Core promoter	IAA-leucine resistant (ILR)-like gene 6	ILL6	IAA-leucine resistant (ILR)-like gene 6	LOC_Os06g47620.1	AT1G44350.1	GO:0016787,GO:0008152
15	Chr10	58200566	C	T	Sobic.010G243000	Core promoter	Protein kinase superfamily protein		Protein kinase superfamily protein	LOC_Os06g47820.1	AT2G18890.1	GO:0004672,GO:0005524,GO:0006468
16	Chr10	58207564	G	A	Sobic.010G243100	three_prime_UTR.1	replicon protein A2	ATRPA2,ATRPA32A,ROR1,RPA2,RPA32A	replicon protein A2	LOC_Os06g47830.1	AT2G24490.1	GO:0003676
17	Chr10	58207580	C	T	Sobic.010G243100	three_prime_UTR.1	replicon protein A2	ATRPA2,ATRPA32A,ROR1,RPA2,RPA32A	replicon protein A2	LOC_Os06g47830.1	AT2G24490.1	GO:0003676
18	Chr10	58215326	C	T	Sobic.010G243200	three_prime_UTR.1	Zinc finger protein 622		Zinc finger protein 622	LOC_Os06g47840.1	AT4G31420.1
19	Chr10	58215341	C	T	Sobic.010G243200	three_prime_UTR.1	Zinc finger protein 622		Zinc finger protein 622	LOC_Os06g47840.1	AT4G31420.1
20	Chr10	58215344	C	T	Sobic.010G243200	three_prime_UTR.1	Zinc finger protein 622		Zinc finger protein 622	LOC_Os06g47840.1	AT4G31420.1
21	Chr10	58215348	C	T	Sobic.010G243200	three_prime_UTR.1	Zinc finger protein 622		Zinc finger protein 622	LOC_Os06g47840.1	AT4G31420.1
22	Chr10	58215370	G	A	Sobic.010G243200	three_prime_UTR.1	Zinc finger protein 622		Zinc finger protein 622	LOC_Os06g47840.1	AT4G31420.1
23	Chr10	58216374	G	A	Sobic.010G243300	Core promoter	Zinc finger protein 622		Zinc finger protein 622	LOC_Os06g47840.1	AT4G31420.1
24	Chr10	58216612	C	T	Sobic.010G243300	Core promoter	Zinc finger protein 622		Zinc finger protein 622	LOC_Os06g47840.1	AT4G31420.1
25	Chr10	58216715	C	T	Sobic.010G243300	Core promoter	Zinc finger protein 622		Zinc finger protein 622	LOC_Os06g47840.1	AT4G31420.1
26	Chr10	58696776	C	T	Sobic.010G249500	Core promoter	mitogen-activated protein kinase homolog 2	ATMPK2,MPK2	mitogen-activated protein kinase homolog 2	LOC_Os06g48590.1	AT1G59580.1	GO:0004672,GO:0005524,GO:0006468,GO:0016773,GO:0009103,GO:0016020
27	Chr10	59140260	C	T	Sobic.010G254800	Core promoter				LOC_Os06g49070.1	AT1G78995.1
28	Chr10	59642203	C	T	Sobic.010G261900	Core promoter	S-adenosyl-L-methionine-dependent methyltransferases superfamily protein		S-adenosyl-L-methionine-dependent methyltransferases superfamily protein	LOC_Os06g49860.1	AT3G51070.1	GO:0008168,GO:0008152
29	Chr10	59642234	G	A	Sobic.010G261900	Core promoter	S-adenosyl-L-methionine-dependent methyltransferases superfamily protein		S-adenosyl-L-methionine-dependent methyltransferases superfamily protein	LOC_Os06g49860.1	AT3G51070.1	GO:0008168,GO:0008152
30	Chr10	59642237	C	T	Sobic.010G261900	Core promoter	S-adenosyl-L-methionine-dependent methyltransferases superfamily protein		S-adenosyl-L-methionine-dependent methyltransferases superfamily protein	LOC_Os06g49860.1	AT3G51070.1	GO:0008168,GO:0008152
31	Chr10	59646653	C	T	Sobic.010G262000	three_prime_UTR.1	FMN-linked oxidoreductases superfamily protein		FMN-linked oxidoreductases superfamily protein	LOC_Os06g49870.1	AT5G67220.1	GO:0000105,GO:0017150,GO:0050660,GO:0008033,GO:0055114
32	Chr10	59740854	G	A	Sobic.010G262900	Core promoter				LOC_Os06g49980.1	AT3G51100.1
33	Chr10	59971168	G	A	Sobic.010G265700	Core promoter	Putative membrane lipoprotein		Putative membrane lipoprotein	LOC_Os06g50090.1	AT4G17085.1
34	Chr10	59974830	G	A	Sobic.010G265800	Core promoter	Protein kinase superfamily protein		Protein kinase superfamily protein	LOC_Os06g50100.1	AT5G47070.1	GO:0004672,GO:0005524,GO:0006468
35	Chr10	59985299	G	A	Sobic.010G266000	Core promoter				LOC_Os06g50130.1	AT2G17972.1
36	Chr10	59985406	C	T	Sobic.010G266000	Core promoter				LOC_Os06g50130.1	AT2G17972.1
37	Chr10	59985489	C	T	Sobic.010G266000	Core promoter				LOC_Os06g50130.1	AT2G17972.1
