# Supplementary material for: A sorghum (Sorghum bicolor) mutant with altered carbon isotope ratio
Source: PLoS One. 2017 Jun 22;12(6):e0179567. doi: 10.1371/journal.pone.0179567 (PMC5480886; doi:10.1371/journal.pone.0179567)
Supplement: S3 Table — (XLSX) [file pone.0179567.s009.xlsx]

## Sheet: Sobic PRimers
Table S3: The list of primer sequence used in the verification of genes (Figure 7)
SN	Primer ID	Forward Primer	Reverse Primer
1	Sobic.010G239700	5-AAC TCA AGC GGC CTA TGG AC - 3	5-CGA GGT GGA TGA ACA TGT CG - 3
3	Sobic.010G241900	5-CAG CTA CAA CGA CTT CAC CG - 3	5-GTG GCA TTG TAC CGG TGA AG - 3
4	Sobic.010G249000	5-AAG GTA AGA CGC CCC AAT CA - 3	5-GCT CAT GAA ACC ACT TGC CA - 3
5	Sobic.010G250100	5-GCC TTT TCC CGA GAT TGC AT - 3	5-AGG GAA GGG AAA TCA GGT GG - 3
6	Sobic.010G263800	5-TTG CTG CTC TGA ATT CTG GC - 3	5-GCG GCA TAT CTA CAG CAC AA - 3
7	Sobic.010G266000	5-AAA CCC CAT CAA CGA AAC GG - 3	5-ACT GGT TCC TCG CCT TCA G - 3
8	Sobic.010G264000	5-CTG GTC CAA CAA ATG CCT CC - 3	5-AGG TCA ACA GCA GCC AAT TG - 3
EF1	EF1	5-CAA CAT TGT GGT CAT TGG CC	5-GCA GTA GTA CTT GGT GGT CT
RPL11	RPL11	5-GGG AAA AGT AAC GGC GGA TC - 3	5-CAT TGG TGG GAT GAT CTG CG - 3
TOC75-III	Toc75-III	5-CGC AAG CAG GAA CGT GAT TA - 3	5-GGC AGC TCT CGG TCT ATG AT - 3
TOC75-III Parlog	Toc75-IIIParalog	5-CCT TGT TCG ACG ACA TGA CC - 3	5-GTT GAC GAA CTT GAG CCG TT - 3
